# Supplementary material for: Model based development of tacrolimus dosing algorithm considering CYP3A5 genotypes and mycophenolate mofetil drug interaction in stable kidney transplant recipients
Source: PubMed Central journal article supplement (PMC6692323; doi:10.1038/s41598-019-47876-0), 2019-08-13
Supplement: 41598_2019_47876_MOESM1_ESM.pdf [file 41598_2019_47876_MOESM1_ESM.pdf]

**Model based development of tacrolimus dosing algorithm considering CYP3A5 genotypes and mycophenolate mofetil drug interaction in stable kidney transplant recipients**

Jae Hyun Kim Ph.D.<sup>1</sup>, Nayoung Han Ph.D.<sup>1</sup>, Myeong Gyu Kim Ph.D.<sup>1,2</sup>, Young Won Kim M.S.<sup>1</sup>, Hayoung Jang B.S.<sup>1</sup>, Hwi-Yeol Yun Ph.D.<sup>3</sup>, Mi-Yeon Yu M.D.<sup>4</sup>, In-Wha Kim Ph.D.<sup>1</sup>, Yon Su Kim M.D., Ph.D.<sup>5,6\*</sup> and Jung Mi Oh Pharm.D.<sup>1\*</sup>

<sup>1</sup>College of Pharmacy and Research Institute of Pharmaceutical Sciences, Seoul National University, Seoul, Republic of Korea

<sup>2</sup>Graduate School of Clinical Pharmacy, CHA University, Republic of Korea

<sup>3</sup>College of Pharmacy, Chungnam National University, Daejeon, Republic of Korea

<sup>4</sup>Department of Internal Medicine, Hanyang University Guri Hospital, Guri, Republic of Korea

<sup>5</sup>Kidney Research Institute, Seoul National University College of Medicine, Seoul, Republic of Korea

<sup>6</sup>Department of Medical Science, Seoul National University College of Medicine, Seoul, Republic of Korea

**\*Co-corresponding Authors**

Yon Su Kim M.D., Ph.D.

Department of Medical Science, Seoul National University College of Medicine, 101 Daehak-ro, Jongno-gu, Seoul 03080, Korea.

Kidney Research Institute, Seoul National University College of Medicine  
101 Daehak-ro, Jongno-gu, Seoul 03080, Korea

Tel.: +82 2 2072 2264; fax: +82 2 745 2264; email address: yonsukim@snu.ac.kr

Jung Mi Oh Pharm.D., College of Pharmacy, Research Institute of Pharmaceutical Sciences,  
Seoul National University, 1 Gwanakro, Gwanak-gu, Seoul 08826, Korea. Tel.: +82 2 880  
7736; fax: +82 2 882 9560; email address: jmoh@snu.ac.kr

## Figure legend

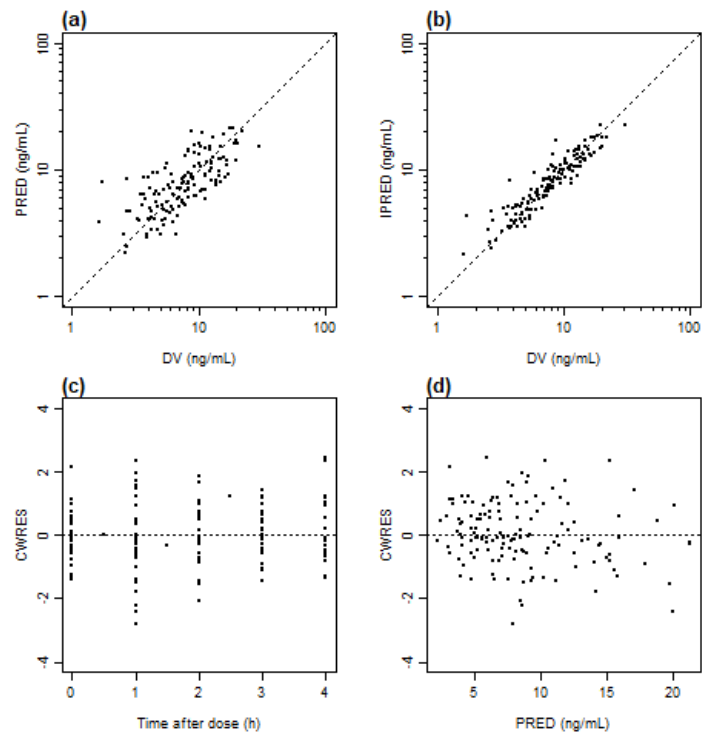

### Supplementary Figure S1 Goodness-of-fit plot of tacrolimus for the population

pharmacokinetic model. (a) population prediction (PRED) vs. observed concentration (DV); (b) individual prediction (IPRED) vs. DV; (c) conditional weighted residuals (CWRES) vs. TIME; (d) CWRES vs. PRED.

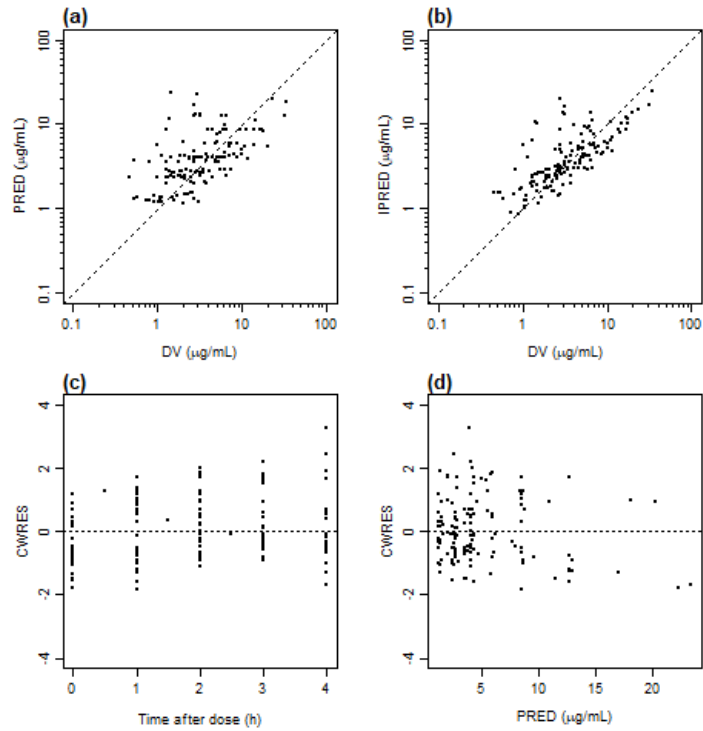

**Supplementary Figure S2** Goodness-of-fit plot of mycophenolic acid for the population pharmacokinetic model. (a) population prediction (PRED) vs. observed concentration (DV); (b) individual prediction (IPRED) vs. DV; (c) conditional weighted residuals (CWRES) vs. TIME; (d) CWRES vs. PRED.

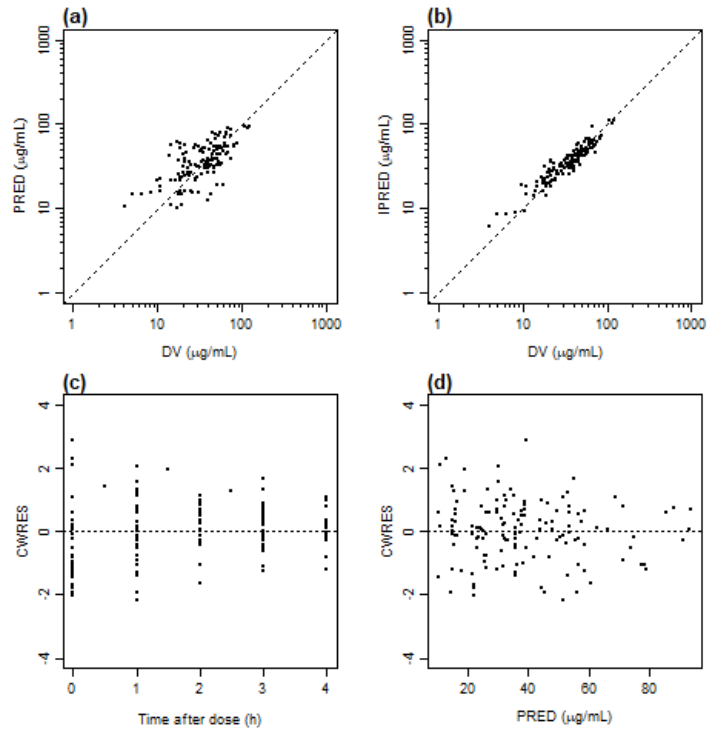

**Supplementary Figure S3** Goodness-of-fit plot of mycophenolic acid 7-O-glucuronide for the population pharmacokinetic model. (a) population prediction (PRED) vs. observed concentration (DV); (b) individual prediction (IPRED) vs. DV; (c) conditional weighted residuals (CWRES) vs. TIME; (d) CWRES vs. PRED.

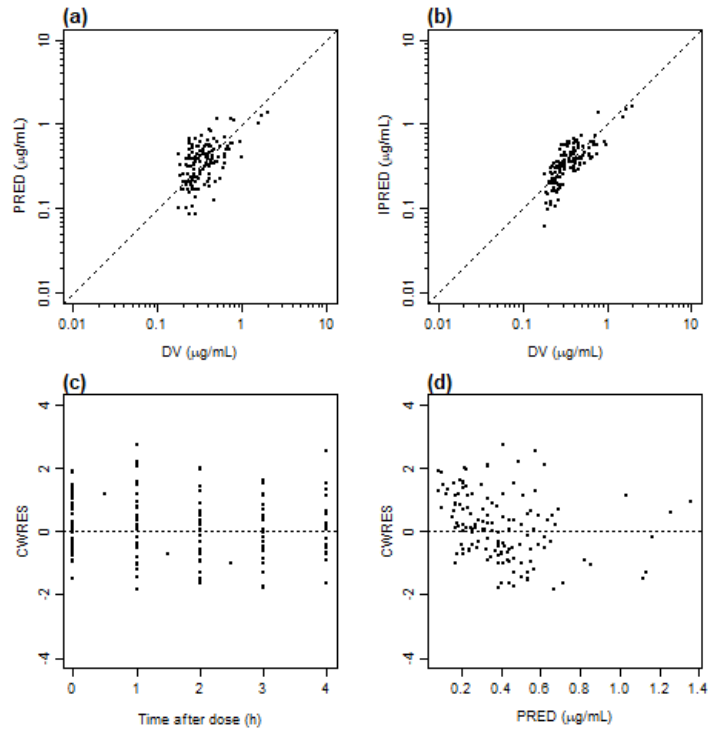

**Supplementary Figure S4** Goodness-of-fit plot of mycophenolic acid acyl glucuronide for the population pharmacokinetic model. (a) population prediction (PRED) vs. observed concentration (DV); (b) individual prediction (IPRED) vs. DV; (c) conditional weighted residuals (CWRES) vs. TIME; (d) CWRES vs. PRED.
